# Supplementary material for: Emergence of a smooth interface from growth of a dendritic network against a mechanosensitive contractile material
Source: eLife journal article supplement (doi:10.7554/elife.66929), 2021-08-23
Supplement: code1 [file SharmaetalAnnotatedcodeforActomyosinAloneModel.pdf › SharmaetalAnnotatedcodeforActomyosinAloneModel.pdf]

---

# This file initiates the nodes of actomyosin material.

## Table of Contents

|                                                                                                                |   |
|----------------------------------------------------------------------------------------------------------------|---|
| It first defines the parameters and then generates both the passive and active nodes in a random fashion. .... | 1 |
| Thereafter it connects the nodes with neighbors to create a connected network. ....                            | 1 |
| Following are the variables for easily assigning to array while initializing ....                              | 1 |
| Following are the parameters used ....                                                                         | 2 |
| ---- Myosin Initialization----- ....                                                                           | 2 |
| % -----making Node IDs----- ....                                                                               | 4 |
| ----Making Node neighbors----- ....                                                                            | 5 |
| Following lines calculate the mean resting length of connections ....                                          | 7 |
| print an image of initial setup ....                                                                           | 7 |

**It first defines the parameters and then generates both the passive and active nodes in a random fashion.**

**Thereafter it connects the nodes with neighbors to create a connected network.**

```
clc
clear all
close all
```

```
cellCenters=[250,250];%
```

**Following are the variables for easily assigning to array while initializing**

```
TOTAL_NODES_AT_LOCATION = 3;
NODE_ID_AT_LOCATION=4;

ROW=1;
COL=2;
MYO_CONC=3;
NO_OF_NEIGHBOR=4;
MOVEORNOT=5;
COMBOVALUE=6;
MEAN_LEN_OF_CONNEC=7;
```

## Following are the parameters used

```
% Lattice defination
bound=500;
rows=bound;
cols=bound;

Combo = zeros(bound,bound);% Used for visualizing the lattice

Myo=zeros(bound,bound); % Used for visualizing the myosin activity
field
Mc_NodeNo = ones(rows,cols).*-1; % Main array holding myosin material
features

ActM=40;% Myosin activation region
MyoR=140;% Total area of myosin

Mc= 350 ; % Active myosin
Dm= 50; % Passive myosin

Den_m=0.3; % myosin density

% Other actomyosin material parameters
Myo_conc=0.9; %Myosin activity per node/concnetration ('M'in paper)
Dis_Thres_Neigh1=5;%500nm distance Myosin Connection Search Distance
('Dthres' in paper)
MaxNeighAllowed=6; % Maximum number of neighbor allowed
Max_myosin_nodes_per_pixels =20;
K=0.5; %Coefficient of myosin pulling
KSp=0.05; % Actin filamnet spring constant connecting myosin nodes

% Defining folder and printing initial image
ver=0;
folder=strcat('UpdatedCaseTest2020_Tempass');
foldername=folder;
if exist(foldername,'dir')~=7
    mkdir(foldername);
else
    while exist(foldername, 'dir')==7
        ver= ver+1;
        foldername= strcat(folder,num2str(ver));
    end
    mkdir(foldername)
end
absoluteFolderPath = foldername;
```

## ----- Myosin Initialization-----

```
disp('initializing Nodes')
```

```
% %% making node IDs and myosin nodes
Mc_NodeCount=1;
% %%% for circular
cellCentTemp = cellCenters(1,:);
cellCenter_x = cellCentTemp(1,2); %% col
cellCenter_y = - cellCentTemp(1,1); %% row

% % fill passive nodes in the allocated area
for x =cellCenter_x-MyoR : cellCenter_x+ MyoR
    y1= cellCenter_y - sqrt((MyoR)^2- (x-cellCenter_x)^2);
    y2= cellCenter_y + sqrt((MyoR)^2- (x-cellCenter_x)^2);
    for y = y1:y2
        row =round(-y);
        col = round(x);
        rno=rand(1);
        if rno< Den_m                % Density of Myosin Nodes
            Combo(row,col)= Dm;      % Passive Myosin in combo
        end
    end
end

% %% for circular or SQUARE - clear the area for activating nodes

for x =cellCenter_x-ActM : cellCenter_x+ ActM
    %   y1= cellCenter_y - sqrt((ActM)^2- (x-cellCenter_x)^2);
    %   y2= cellCenter_y + sqrt((ActM)^2- (x-cellCenter_x)^2);
    %   for y = y1:y2
for y= cellCenter_y-ActM-35 : cellCenter_y+ ActM+35
        row =round(-y);
        col = round(x);

        Combo(row,col)= 0;          % Myosin in combo
    end
end
%

NoOfpassiveMyosin = sum(sum(Combo))/Dm;

NoOfActiveMyosin=0;

% %% ----Fill the allocated area with active nodes
for x =cellCenter_x-ActM : cellCenter_x+ActM
    %   y1= cellCenter_y - sqrt(ActM^2- (x-cellCenter_x)^2);
    %   y2= cellCenter_y + sqrt((ActM)^2- (x-cellCenter_x)^2);
    %   for y = y1:y2
for y= cellCenter_y-ActM-35 : cellCenter_y+ ActM+35
        row =round(-y);
        col = round(x);
        rno=rand(1);
        if rno< Den_m                % Density of Myosin Nodes
            Combo(row,col)= Mc;      % Active Myosin in combo
            NoOfActiveMyosin=NoOfActiveMyosin+1;
        end
    end
end
```

```
end  
end
```

```
fig = figure;  
imagesc(Combo)  
NoofMyonodes=0;
```

```
NoOfMyosinNodesa = NoofMyonodes;
```

```
initializing Nodes
```

## % -----making Node IDs-----

```
% Mc_Node is an array that holds the information and flags for each  
% node of  
% myosin, like its active or passive, its position etc.  
  
Mc_NodeCount=1;  
NodeCountPerPixel=zeros(bound,bound);  
disp('Making NodeIds')  
for colNo=1:bound  
    for rowNo=1:bound  
        if Combo(rowNo,colNo)>0  
  
            NodeCountPerPixel(rowNo, colNo) = NodeCountPerPixel(rowNo,  
colNo) + 1 ;  
            Mc_NodeNo(rowNo,colNo)=Mc_NodeCount;  
  
            Mc_Node(Mc_NodeCount,ROW)=rowNo;  
            Mc_Node(Mc_NodeCount,COL)=colNo;  
            Mc_Node(Mc_NodeCount,NO_OF_NEIGHBOR)=0; %NoOfNeighbour  
            Mc_Node(Mc_NodeCount,COMBOVALUE)=Combo(rowNo,colNo); %%  
            Helpful when testing active passive nodes  
            Mc_Node(Mc_NodeCount,MEAN_LEN_OF_CONNEC)=0; %% helpful for  
            calculation of tn_rest dynamically for each simulation  
            if Combo(rowNo, colNo)==Mc  
                Mc_Node(Mc_NodeCount,MYO_CONC)=Myo_conc;%rand(1);  
            else  
                Mc_Node(Mc_NodeCount,MYO_CONC)=0;  
            end  
  
            if rowNo> (bound-15) | rowNo<15 | colNo>(bound-15) |  
colNo<15  
                Mc_Node(Mc_NodeCount,MOVEORNOT)=1;%Moveable Node  
            else  
                Mc_Node(Mc_NodeCount,MOVEORNOT)=0;  
            end  
        %  
  
        Mc_NodeCount=Mc_NodeCount+1;  
    end  
end
```

```
end
Mc_NodeCount=Mc_NodeCount-1;

%%%%%-Initialization Ends-----%

disp('Making Node Neighbors')
```

## -----Making Node neighbors-----

```
neighborhood = zeros(Mc_NodeCount,MaxNeighAllowed);
%
AvailNeighRegistry=zeros(Mc_NodeCount,1);
RandNodes=randperm(Mc_NodeCount);

for i = 1:Mc_NodeCount
    NodeID= RandNodes(i) ; %randomly select a myosin node
    AN=0;

    if (Mc_Node(NodeID,4)<MaxNeighAllowed)%check if the #neighbors is
    less than allowed

        rowNo = Mc_Node(NodeID,ROW);
        colNo = Mc_Node(NodeID,COL);

        % % search a circular area for neighbors
        for x= round(rowNo)-
Dis_Thres_Neigh1:round(rowNo)+Dis_Thres_Neigh1
            y1= colNo - sqrt(Dis_Thres_Neigh1^2- (x-round(rowNo))^2);
            y2= colNo + sqrt(Dis_Thres_Neigh1^2- (x-round(rowNo))^2);
            % [NodeID x y1 y2]
            for y= y1:y2
                if Mc_NodeNo(round(x),round(y))>0 &&
Mc_NodeNo(round(x),round(y))~= NodeID %% if you found a neighbor
                    NeighborID = Mc_NodeNo(round(x),round(y));

                    % % check if the neighbor you found is already
                    % listed as neighbor to avoid redundancy

                    alreadyANeighbor = 0;
                    for k= 1:Mc_Node(NodeID,NO_OF_NEIGHBOR)
                        if NeighborID == neighborhood(NodeID,k)
                            alreadyANeighbor=1;
                            break;
                        end
                    end

                    % % add the neighbor in the available neighbor
                    % list to be used for selecting neighbors
                    if ((alreadyANeighbor==0) &&
Mc_Node(NeighborID,4)<(MaxNeighAllowed))
                        AN=AN+1;
                        AvailableNeighbors(NodeID, AN)=NeighborID;
```

```
end

end

end

end

% % check here if Available Neighbors array is formed

neighborAllowed = MaxNeighAllowed - Mc_Node(NodeID,4);

if AN>0

    if AN <= neighborAllowed

        for i= 1:AN

            NeighborID=AvailableNeighbors(NodeID,i);

            %make connection
            neighborhood(NodeID,
Mc_Node(NodeID,NO_OF_NEIGHBOR)+1) = NeighborID;%add neighborId to
neighborhood array of selected node
            neighborhood(NeighborID,
Mc_Node(NeighborID,NO_OF_NEIGHBOR)+1) = NodeID; % add selected nodeId
to neighborhood array of neighbor

            %update neighborcount of both neighbor and node
            Mc_Node(NeighborID,NO_OF_NEIGHBOR) =
Mc_Node(NeighborID,NO_OF_NEIGHBOR)+1;
            Mc_Node(NodeID,NO_OF_NEIGHBOR) =
Mc_Node(NodeID,NO_OF_NEIGHBOR)+1;

        end

        % this is the case when there are more available neighbors
than required and so you have to select which neighbors you will make
connection with
        else
            R = randperm(AN,neighborAllowed);

            % repeat making connections
            for i= 1:neighborAllowed

                NeighborID=AvailableNeighbors(NodeID,R(i));

                %make connection
                neighborhood(NodeID,
Mc_Node(NodeID,NO_OF_NEIGHBOR)+1) = NeighborID;
                neighborhood(NeighborID,
Mc_Node(NeighborID,NO_OF_NEIGHBOR)+1) = NodeID;
                %update neighborcount
                Mc_Node(NeighborID,NO_OF_NEIGHBOR) =
Mc_Node(NeighborID,NO_OF_NEIGHBOR)+1;
```

```
        Mc_Node(NodeID,NO_OF_NEIGHBOR) =  
        Mc_Node(NodeID,NO_OF_NEIGHBOR)+1;  
  
        end  
    end  
end  
  
end
```

## Following lines calculate the mean resting length of connections

```
for NodeID = 1: Mc_NodeCount  
    Connection_length=0;  
    tn_Nb=0;  
    for i = 1: Mc_Node(NodeID,NO_OF_NEIGHBOR) % for all  
neighbors  
  
        NbID = neighborhood(NodeID,i); % get Neighbor id  
  
        tn_c_Nb= Mc_Node(NbID,COL)- Mc_Node(NodeID,COL); %  
OUTWARD VECTOR since pulling from neighbor will be directed out  
  
        tn_r_Nb= Mc_Node(NbID,ROW)- Mc_Node(NodeID,ROW);  
  
        tn_Nb = 0.001+sqrt((tn_r_Nb)^2 + (tn_c_Nb)^2);  
  
        Connection_length= Connection_length+tn_Nb;  
    end  
  
    if Mc_Node(NodeID,NO_OF_NEIGHBOR)>0  
        Mc_Node(NodeID,MEAN_LEN_OF_CONN)=Connection_length/  
Mc_Node(NodeID,NO_OF_NEIGHBOR) ;  
    else  
        Mc_Node(NodeID,MEAN_LEN_OF_CONN)=0;  
    end  
end  
tn_rest= mean(Mc_Node(:,MEAN_LEN_OF_CONN));
```

## print an image of initial setup

```
cd (absoluteFolderPath)  
filename=strcat('initialImage');  
fig = figure;  
imagesc(Combo)  
% imshow(Cap)  
print(fig,filename,'-dpng');  
% filename=strcat('initialMyo');  
% fig = figure;
```

```
%  
% imshow(Myo)  
% print(fig,filename,'-dpng');  
cd ..
```

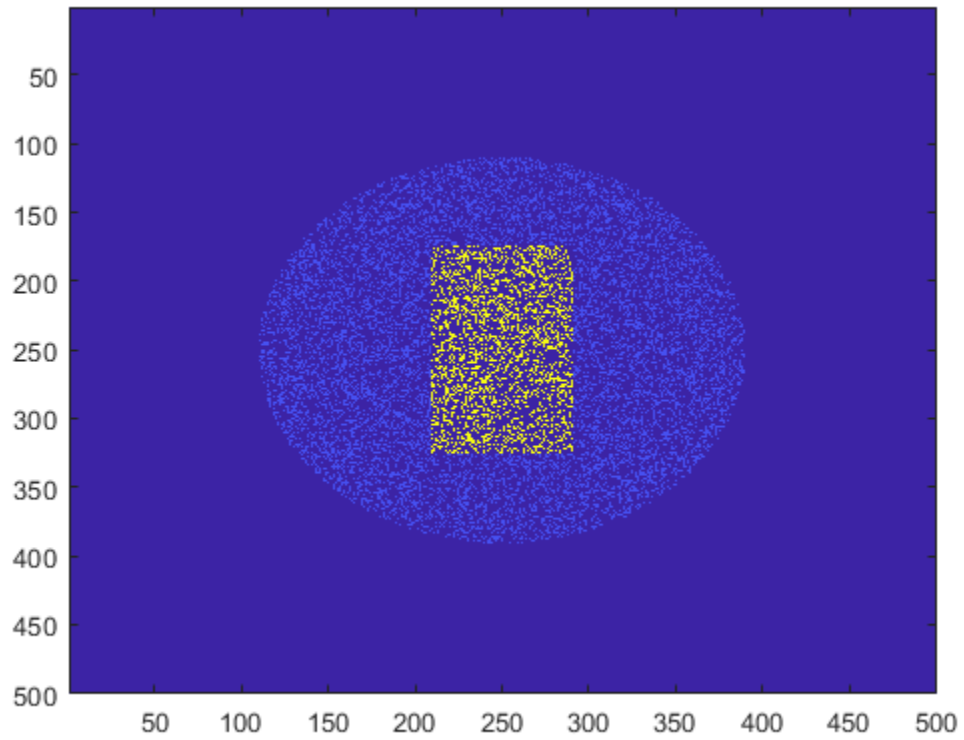

*Published with MATLAB® R2020b*



---

## Table of Contents

|                                                                                      |   |
|--------------------------------------------------------------------------------------|---|
| SIMULATION STARTS HERE .....                                                         | 1 |
| -----Myosin forces calculation----- .....                                            | 1 |
| If there is tension in the spring .....                                              | 2 |
| ---Following lines of code apply the forces calculated above to move the nodes ..... | 3 |
| -----Visualize the output ----- .....                                                | 4 |

## SIMULATION STARTS HERE

This file is used to run the simulation after the initialization is completed. It first calculates force on individual nodes of actomyosin material and then moves nodes based on the force applied, thus implementing Equation 1-4. Finally it generates output in form of images to visualize and study material behavior in the given setup.

```
NodeDensity = zeros(4000,2);
for mcs=1:3500

    mcs

    NewActin=0;

    F_am=zeros(Mc_NodeCount,2); % net Actomyosin force
    F_r_Nb= zeros(Mc_NodeCount,MaxNeighAllowed); % Actomyosin force
    in x direction by ith neighbor
    F_c_Nb= zeros(Mc_NodeCount,MaxNeighAllowed); % actomyosin force
    in y direction by ith neighbor
    F_r_NbSp= zeros(Mc_NodeCount,MaxNeighAllowed); % Spring force in x
    direction by ith neighbor
    F_c_NbSp= zeros(Mc_NodeCount,MaxNeighAllowed); % Spring force in
    y direction by ith neighbor
    F_Spring=zeros(Mc_NodeCount,2); % Net PRing force by all
    nneighbors
    F_myot=zeros(Mc_NodeCount,2);
```

## -----Myosin forces calulation-----

```
RandNodes=randperm(Mc_NodeCount);
for i = 1: Mc_NodeCount
    NodeID= RandNodes(i);
    % % Calculating forces
    if Mc_Node(NodeID,MOVEORNOT)==1
        % disp('found a fixed node, so net force is
zero')
        F_MyoT(NodeID,ROW)= 0;
        F_MyoT(NodeID,COL)= 0;
        % disp('NodeID=')NodeID ;
    else
        % Force calculation of myosin starts here....
```

---

```

        for i = 1: Mc_Node(NodeID,NO_OF_NEIGHBOR) % for all
neighbors
            NbID = neighborhood(NodeID,i); % get Neighbor iD

            tn_c_Nb= Mc_Node(NbID,COL)- Mc_Node(NodeID,COL); %
OUTWARD VECTOR since pulling from neighbor will be directed out

            tn_r_Nb= Mc_Node(NbID,ROW)- Mc_Node(NodeID,ROW);

            tn_Nb = 0.001+sqrt((tn_r_Nb)^2 + (tn_c_Nb)^2); %
distance between node and neighbor (adding .001 to avoid numerical
instability.)

```

## If there is tension in the spring

----Implementing Equation-2 -----

```

        F_NbSp=0;
        if tn_Nb>tn_rest

            % % Spring force calculation

            F_NbSp = KSp*(tn_Nb- tn_rest); % force generated
due to spring = constant times spring tension

            F_r_NbSp(NodeID,i)= F_NbSp*(tn_r_Nb/tn_Nb); %
outward force felt by the node due to tension
            F_c_NbSp(NodeID,i)= F_NbSp*(tn_c_Nb/tn_Nb);% This
is equal to magnitude*unit vector

        end

        F_Spring(NodeID,ROW)= F_Spring(NodeID,ROW) +
F_r_NbSp(NodeID,i);%adding forces by all the neighbors
        F_Spring(NodeID,COL)= F_Spring(NodeID,COL)+
F_c_NbSp(NodeID,i);

        % % Inter-myosin force calculation
        % ----Implementing Equation-1 -----
        % % calculate pulling forces from myosin neighbors
        F_Nb=0;
        AM_Neighbor= Mc_Node(NbID,MYO_CONC); %fetch the
myosin activity on node and neighbor
        AM_BaseNode= Mc_Node(NodeID,MYO_CONC);

        F_Nb =(K*AM_Neighbor*AM_BaseNode); % force magnitude

        F_r_Nb(NodeID,i)=F_Nb*(tn_r_Nb/tn_Nb); % Actomyosin
force on the node due to ith neighbor
        F_c_Nb(NodeID,i)=F_Nb*(tn_c_Nb/tn_Nb); % magnitude *
unit vector

```

---

```

        F_am(NodeID,ROW)= F_am(NodeID,ROW)+
F_r_Nb(NodeID,i); %%adding forces by all the neighbors
        F_am(NodeID,COL)= F_am(NodeID,COL)+
F_c_Nb(NodeID,i); %

    end

    F_myot(NodeID,ROW)= F_am(NodeID,ROW)+F_Spring(NodeID,ROW);
    F_myot(NodeID,COL)= F_am(NodeID,COL)+F_Spring(NodeID,COL);

end

end

```

**----Following lines of code apply the forces calculated above to move the nodes**

```

%%----- Implementing equation-4-----

Combo = zeros(bound,bound); %% Resetting the lattice

RandNodes=randperm(Mc_NodeCount);
for i = 1: Mc_NodeCount
    NodeID= RandNodes(i);

    colNo= Mc_Node(NodeID,COL);
    rowNo= Mc_Node(NodeID,ROW);

    % % rounding to 2 didgit to control spatial resolution
    NewcolNo = round(colNo+ F_myot(NodeID,COL),2);
    NewrowNo = round(rowNo+ F_myot(NodeID,ROW),2);

    %%Next each node checks if the space is available or already
    %%saturated by maximum no of nodes
    noOfNodesAtNewPosition = NodeCountPerPixel((round(NewrowNo)),
(round(NewcolNo)));

    if noOfNodesAtNewPosition == Max_myosin_nodes_per_pixels
        NewcolNo= colNo;
        NewrowNo= rowNo;
    end

%%----- Update the variables with new position to implement the
move---

Mc_NodeNo(round(Mc_Node(NodeID,ROW)),round(Mc_Node(NodeID,COL)))= -1;
%% reset the NodeNo in order to create it again afresh

```

---

```

        Mc_Node(NodeID,ROW)= NewrowNo; %
        Mc_Node(NodeID,COL)= NewcolNo;

        Mc_NodeNo(round(NewrowNo),round(NewcolNo))=NodeID;

        Combo(round(NewrowNo),round(NewcolNo))=
        Mc_Node(NodeID,COMBOVALUE); % refresh combo

        NodeCountPerPixel((round(NewrowNo)), (round(NewcolNo))) =
        NodeCountPerPixel((round(NewrowNo)), (round(NewcolNo))) + 1;
        NodeCountPerPixel((round(rowNo)), (round(colNo))) =
        NodeCountPerPixel((round(rowNo)), (round(colNo))) - 1 ;

    end
    %%%%%%%%%-----END-----%%%%%%%%

```

## -----Visualize the output -----

```

    if (mcs)==2
        close all
        cd (absoluteFolderPath)
        Actinfoldername=strcat('Combo');
        mkdir(Actinfoldername);
        cd (Actinfoldername)
        filename=strcat('Actin_',num2str(mcs));
        fig = figure;
        C=uint8(Combo);
        imshow(C)
        axis square
        print(fig,filename,'-dpng');

        cd ..
        cd ..

        %
    end

    if mod(mcs,100)==0
        close all
        cd (absoluteFolderPath)
        Actinfoldername=strcat('Combo');
        mkdir(Actinfoldername);
        cd (Actinfoldername)
        filename=strcat('Actin_',num2str(mcs));
        fig = figure;
        %             imagesc(Combo)
        %             colormap('hot')
        C=uint8(Combo);
        imshow(C)
        %             imshow(C, 'Colormap', jet(255))
        axis square
        print(fig,filename,'-dpng');
    end

```

---

```
        cd  . .  
        cd  . .  
    %  
end  
%  
end
```

*Published with MATLAB® R2020b*
