# Supplementary material for: Emergence of a smooth interface from growth of a dendritic network against a mechanosensitive contractile material
Source: eLife journal article supplement (doi:10.7554/elife.66929), 2021-08-23
Supplement: code3 [file SharmaetalAnnotatedcodeforCombinedModel.pdf › SharmaetalAnnotatedcodeforCombinedModel.pdf]

---

# **This file is used for initialization of the two materials i.e., defining initial position of actomyosin and actin nodes.**

## **Table of Contents**

|                                                                                                              |   |
|--------------------------------------------------------------------------------------------------------------|---|
| After defining the node properties, it connects the nodes with neighbors to create a connected network. .... | 1 |
| This is the first file to be run followed by 'Simulate_CombinedModel' .....                                  | 1 |
| -----Actomyosin material Initialization----- .....                                                           | 1 |
| --- Nucleation points and actin Initialization by calling 'InitiateActin' module .....                       | 2 |
| Clear myosin from actin area .....                                                                           | 2 |
| ---Defining Myosin nodes properties ---- .....                                                               | 3 |
| -----Making Node neighbors----- .....                                                                        | 4 |
| Following lines calculate the mean resting length of connections .....                                       | 6 |
| print an image of initial setup .....                                                                        | 7 |

**After defining the node properties, it connects the nodes with neighbors to create a connected network.**

**This is the first file to be run followed by 'Simulate\_CombinedModel'**

```
clc
% clear all
close all

% Following module is called to define different parameters that are
% used
% in this simulation

ParameterDefination
```

**-----Actomyosin material Initialization-----**

```
disp('initializing Nodes')
```

This file is used for initialization of the two materials i.e., defining initial position of actomyosin and actin nodes.

---

```

cellCenTemp = cellCenters(1,:);
cellCenter_x = 500;% cellCenTemp(1,2); %% col
cellCenter_y =-500;% - cellCenTemp(1,1); %% row

% fill whole area with passive myosin
for x =cellCenter_x-(bound/2-6) : cellCenter_x+ (bound/2-6)  %% 6 px
    are deducted to prevent lattice boundary colision
    for y = cellCenter_y-(bound/2-6) : cellCenter_y+ (bound/2-6)
        row =round(-y);
        col = round(x);
        rno=rand(1);
        if rno< Den_m                % Density of Myosin Nodes
            Combo(row,col)= Dm;      % Myosin in combo
        end
    end
end

% In the desired area convert passive myosin to active
for x =cellCenter_x-MyoR : cellCenter_x+ MyoR
    y1= cellCenter_y - sqrt((MyoR)^2- (x-cellCenter_x)^2);
    y2= cellCenter_y + sqrt((MyoR)^2- (x-cellCenter_x)^2);
    for y = y1:y2
        row =round(-y);
        col = round(x);
        % Density of Myosin Nodes
        if Combo(row,col)== Dm
            Combo(row,col)= Mc;
        end % Myosin in combo
    end
end
end

```

## ---- Nucleation points and actin Initialization by calling 'InitiateActin' module

InitiateActin

## Clear myosin from actin area

```

for i=1:length(cellCenters)
    cellCenTemp = cellCenters(i,:);
    cellCenter_x = cellCenTemp(1,2); %% col
    cellCenter_y = - cellCenTemp(1,1); %% row

    for x =cellCenter_x-CapR : cellCenter_x+ CapR
        y1= cellCenter_y - sqrt((CapR)^2- (x-cellCenter_x)^2);
        y2= cellCenter_y + sqrt((CapR)^2- (x-cellCenter_x)^2);
        for y = y1:y2
            row =round(-y);
            col = round(x);

```

This file is used for initialization of the two materials i.e., defining initial position of actomyosin and actin nodes.

---

```

if Combo(round(row),round(col))== Ac

    for r= row -5 : row +5
        for c= col-5: col+5
            Combo(r,c)= 0;      % Myosin in combo
            Combo(row,col)= Ac;  % Actin in combo
        end
    end
end
end
end
end
end

```

## ---Defining Myosin nodes properties -----

```

% % making Node IDs

% Mc_Node is an array that holds the information and flags for each
% node of
% myosin, like its active or passive, its position etc.

Mc_NodeCount=1;
NodeCountPerPixel=zeros(bound,bound);
disp('Making NodeIds')
for colNo=1:bound
    for rowNo=1:bound
        if Combo(rowNo,colNo)>0

            NodeCountPerPixel(rowNo, colNo) = NodeCountPerPixel(rowNo,
colNo) + 1 ; % update the #nodes on the picked pixel
            Mc_NodeNo(rowNo,colNo)=Mc_NodeCount; % Mc_NodeNo will hold
the node ID of node at that position. right now Count=ID

            Mc_Node(Mc_NodeCount,ROW)=rowNo; %Update Myosin array with
rowNo
            Mc_Node(Mc_NodeCount,COL)=colNo; %Update Myosin array
with colNo
            Mc_Node(Mc_NodeCount,NO_OF_NEIGHBOR)=0; %Update Myosin
array with NoOfNeighbour
            Mc_Node(Mc_NodeCount,COMBOVALUE)=Combo(rowNo,colNo); %%
Helpful when testing active passive nodes
            Mc_Node(Mc_NodeCount,MEAN_LEN_OF_CONNEC)=0; %% helpful for
calculation of tn_rest dynamically for each simulation
            if Combo(rowNo, colNo)==Mc
                Mc_Node(Mc_NodeCount,MYO_CONC)=Myo_conc;%
            else
                Mc_Node(Mc_NodeCount,MYO_CONC)=0;
            end

            if rowNo> (bound-15) | rowNo<15 | colNo>(bound-15) |
colNo<15

                Mc_Node(Mc_NodeCount,MOVEORNOT)=1;%Moveable NOde

```

This file is used for initialization of the two materials i.e., defining initial position of actomyosin and actin nodes.

```
else
    Mc_Node(Mc_NodeCount,MOVEORNOT)=0;
end

Mc_NodeCount=Mc_NodeCount+1;
end
end
end
Mc_NodeCount=Mc_NodeCount-1;

%%%%%-Initialization Ends-----%%%%%%%%

disp('Making Node Neighbors')
```

## -----Making Node neighbors-----

```
neighborhood = zeros(Mc_NodeCount,MaxNeighAllowed);
%
AvailNeighRegistry=zeros(Mc_NodeCount,1);
RandNodes=randperm(Mc_NodeCount);

for i = 1:Mc_NodeCount
    NodeID= RandNodes(i) ; %randomly select a myosin node
    AN=0;

    if(Mc_Node(NodeID,4)<MaxNeighAllowed) % check if the #neighbors is
less than allowed

        rowNo = Mc_Node(NodeID,ROW);
        colNo = Mc_Node(NodeID,COL);

        % % search a circular area for neighbors
        for x= round(rowNo)-
Dis_Thres_Neigh1:round(rowNo)+Dis_Thres_Neigh1
            y1= colNo - sqrt(Dis_Thres_Neigh1^2- (x-round(rowNo))^2);
            y2= colNo + sqrt(Dis_Thres_Neigh1^2- (x-round(rowNo))^2);
            % [NodeID x y1 y2]
            for y= y1:y2
                if Mc_NodeNo(round(x),round(y))>0 &&
Mc_NodeNo(round(x),round(y))~= NodeID %% if you found a neighbor
                    NeighborID = Mc_NodeNo(round(x),round(y));

                    % % check if the neighbor you found is already
                    % listed as neighbor to avoid redundancy

                    alreadyANeighbor = 0;
                    for k= 1:Mc_Node(NodeID,NO_OF_NEIGHBOR)
                        if NeighborID == neighborhood(NodeID,k)
                            alreadyANeighbor=1;
                            break;
                        end
                    end
```

This file is used for initialization of the two materials i.e., defining initial position of actomyosin and actin nodes.

---

```
% % add the neighbor in the available neighbor
% list to be used for selecting neighbors
if ((alreadyANeighbor==0) &&
Mc_Node(NeighborID,4)<(MaxNeighAllowed))
    AN=AN+1;
    AvailableNeighbors(NodeID, AN)=NeighborID;

end

end

end

end

% % check here if Available Neighbors array is formed

neighborAllowed = MaxNeighAllowed - Mc_Node(NodeID,4); % get
to know how many neighbors can node form

if AN>0

    if AN <= neighborAllowed

        for i= 1:AN

            NeighborID=AvailableNeighbors(NodeID,i);

            %make connection
            neighborhood(NodeID,
Mc_Node(NodeID,NO_OF_NEIGHBOR)+1) = NeighborID; %add neighborId to
neighborhood array of selected node
            neighborhood(NeighborID,
Mc_Node(NeighborID,NO_OF_NEIGHBOR)+1) = NodeID; % add selected nodeId
to neighborhood array of neighbor

            %update neighborcount of both neighbor and node
            Mc_Node(NeighborID,NO_OF_NEIGHBOR) =
Mc_Node(NeighborID,NO_OF_NEIGHBOR)+1;
            Mc_Node(NodeID,NO_OF_NEIGHBOR) =
Mc_Node(NodeID,NO_OF_NEIGHBOR)+1;

        end

    else % this is the case when there are more available
neighbors than required and so you have to select which neighbors you
will make connection with
        R = randperm(AN,neighborAllowed);

        % repeat making connections
        for i= 1:neighborAllowed

            NeighborID=AvailableNeighbors(NodeID,R(i));
```

This file is used for initialization of the two materials i.e., defining initial position of actomyosin and actin nodes.

---

```

%make connection
neighborhood(NodeID,
Mc_Node(NodeID,NO_OF_NEIGHBOR)+1) = NeighborID;
neighborhood(NeighborID,
Mc_Node(NeighborID,NO_OF_NEIGHBOR)+1) = NodeID;
%update neighborcount
Mc_Node(NeighborID,NO_OF_NEIGHBOR) =
Mc_Node(NeighborID,NO_OF_NEIGHBOR)+1;
Mc_Node(NodeID,NO_OF_NEIGHBOR) =
Mc_Node(NodeID,NO_OF_NEIGHBOR)+1;

end
end
end
end

end
%
```

## Following lines calculate the mean resting length of connections

```

count = 0
csvdata=zeros(Mc_NodeCount*6,7);

for NodeID = 1: Mc_NodeCount
    Connection_length=0;
    tn_Nb=0;
    for i = 1: Mc_Node(NodeID,NO_OF_NEIGHBOR) % for all neighbors

        NbID = neighborhood(NodeID,i); % get Neighbor iD

        tn_c_Nb= Mc_Node(NbID,COL)- Mc_Node(NodeID,COL); % OUTWARD
        VECTOR since pulling from neighbor will be directed out

        tn_r_Nb= Mc_Node(NbID,ROW)- Mc_Node(NodeID,ROW);

        tn_Nb = 0.001+sqrt((tn_r_Nb)^2 + (tn_c_Nb)^2);

        Connection_length= Connection_length+tn_Nb;
        count = count +1

        csvdata(count,:)=[NodeID,NbID,Mc_Node(NodeID,ROW),Mc_Node(NodeID,COL),Mc_Node(NbID,ROW),Mc_Node(NbID,COL)];

    end

    if Mc_Node(NodeID,NO_OF_NEIGHBOR)>0
        Mc_Node(NodeID,MEAN_LEN_OF_CONN)=Connection_length/
        Mc_Node(NodeID,NO_OF_NEIGHBOR) ;
    end
end
```

This file is used for initialization of the two materials i.e., defining initial position of actomyosin and actin nodes.

---

```
else
    Mc_Node(NodeID,MEAN_LEN_OF_CONNEC)=0;
end
end
tn_rest= mean(Mc_Node(:,MEAN_LEN_OF_CONNEC));

cd (absoluteFolderPath)
csvwrite('csvdata0.csv',csvdata(1:count,:));
cd ..

%
% %% deleting actin nodes if simulations are to be done without actin
% cap
% %
% le= length(Ac_Node);
% for NodeID= le:-1:1
%     Ac_Node(NodeID,:)=[];
%     Ac_NodeCount=Ac_NodeCount-1;
% end
% Ac_NodeNo=zeros(bound,bound);
```

## print an image of initial setup

```
cd (absoluteFolderPath)
filename=strcat('initialImage');
fig = figure;
imagesc(Combo)
% imshow(Cap)
print(fig,filename,'-dpng');
% filename=strcat('initialMyo');
% fig = figure;
%
% imshow(Myo)
% print(fig,filename,'-dpng');
cd ..
```

*Published with MATLAB® R2020b*

---

# **This files stores all the parameter values that are used in the respective simulation.**

## **Table of Contents**

|                                                                                                 |   |
|-------------------------------------------------------------------------------------------------|---|
| It also creates the folder in which the data of the simulation will be stored at run time ..... | 1 |
| Following are the variables for easily assigning to array while initializing .....              | 1 |
| Following are the parameters used .....                                                         | 1 |
| Other actin material parameters .....                                                           | 2 |
| Other actomyosin material parameters .....                                                      | 2 |
| Intermaterial parameters .....                                                                  | 3 |
| Defining folder and printing initial image .....                                                | 3 |

## **It also creates the folder in which the data of the simulation will be stored at run time**

```
cellCenters= [500,500; 300,500; 700,500; 400,330; 600,330; 400,670;  
600,670; 200,330; 200, 670; 500,840; 800, 670; 800, 330; 500,160];
```

## **Following are the variables for easily assigning to array while initializing**

```
TOTAL_NODES_AT_LOCATION = 3;  
NODE_ID_AT_LOCATION=4;
```

```
ROW=1;  
COL=2;  
MYO_CONC=3;  
NO_OF_NEIGHBOR=4;  
MOVEORNOT=5;  
COMBOVALUE=6;  
MEAN_LENOFCONNEC=7;
```

```
BRANCHORNOT=4;  
ASSCNPF=3;  
THETA=5;  
LEN=6;  
MCSATBIRTH=7;  
AGE=8;
```

## **Following are the parameters used**

```
% Lattice defination
```



This files stores all the parameter values that are used in the respective simulation.

---

```
bound=1000;
rows=bound;
cols=bound;

Combo = zeros(bound,bound); % Used for visualizing the lattice
npfChart= zeros(bound,bound); % Specifies where the nucleation
promoters are present
Myo=zeros(bound,bound); % Used for visualizing the myosin activity
field

Mc_NodeNo = ones(rows,cols).*-1; % Main array holding myosin material
features
Ac_NodeNo = ones(rows,cols).*-1; % Main array holding actin material
features

CapR1=20; % Inner radius of actin initialization
CapR=50;% Outer radius of actin initialization
MyoR=400; % Whole myosin distribution area radius

Vnpf=50; %Value assigned to nucleation point in npfChart, Used for
initialization
Ac= 150 ; % Actin value used for visualization
Mc= 350; % Active Myosin value for visualization
Dm=200; % Dead Myosin value for visualization

Den_c1=0.1;% initial npf density used for inner radius
Den_c=0.01; % initial npf density used for outer radius
Den_m=0.2; % myosin density
```

## Other actin material parameters

```
AgeBr=9; % age of branching
Knpf=0.5; % 'Kpoly' or Actin polymerization coefficient
Lth=20; % Max length
AgeTh=20; % Age of Depolymerization
P_del=0.7; %probability of deletion
```

## Other actomyosin material parameters

```
Myo_conc=0.1; %Myosin activity per node/concnetration ('M'in paper)
Dis_Thres_Neigh1=5;%500nm distance Myosin Connection Search Distance
('Dthres' in paper)
MaxNeighAllowed=6; % Maximum number of neighbor allowed
Max_myosin_nodes_per_pixels =20;
K=0.5; %Coefficient of myosin pulling
KSp=0.05; % Actin filamnet spring constant connecting myosin nodes
```

## Intermaterial parameters

```
SR=5; %myosin and actin search radius for each other or Inter-material
SR
Aura= 2; % Inter-material Volume Exclusion Threshold ('Vex' )
```

## Defining folder and printing initial image

```
ver=0; % used to create a new name for the file. Helpful in
iterations
folder=strcat('FxyHYwithCapDen_c1_',num2str(Den_c1),'Den_c_',num2str(Den_c),'Den_m
is where file will save
foldername=folder;
if exist(foldername,'dir')==7
    mkdir(foldername);
else
    while exist(foldername, 'dir')==7
        ver= ver+1;
        foldername= strcat(folder,num2str(ver));
    end
    mkdir(foldername)
end
absoluteFolderPath = foldername;

% % Setting directions used to initialize actin from npf. Used to
direct
% arp 2/3 actin in different directions
k=1;
for i=-1:1
    for j=-1:1
        if i==0 & j==0
            continue
        else
            directions(k,1)= i; %r
            directions(k,2)= j; %c
            directions(k,3)= rad2deg(cart2pol(j,-i));
            k=k+1;
        end
    end
end
end
```

*Published with MATLAB® R2020b*

---

# This file is called by 'SetUp\_Initiate' to initiate Arp2/3 actin nodes and nucleation points

```
disp('initializing Npfs')

%%-----Following lines of code will create a circular random area
%%containing nucleation points

for i=1:length(cellCenters)
% %% for circular
cellCenTemp = cellCenters(i,:);
cellCenter_x= cellCenTemp(1,2); %% col
cellCenter_y= - cellCenTemp(1,1); %% row
for x =cellCenter_x-CapR1 : cellCenter_x+CapR1
    y1= cellCenter_y - sqrt(CapR1^2- (x-cellCenter_x)^2);
    y2= cellCenter_y + sqrt((CapR1)^2- (x-cellCenter_x)^2);
    for y = y1:y2
        row =round(-y);
        col = round(x);
        rno=rand(1);
        if rno< Den_c1                % Density of inner Actin Nodes in
cap
            npfChart(row,col)= Vnpf;    % Initializing Nucleation
points
        end
    end
end
end

for i=1:length(cellCenters)
% %% for circular
cellCenTemp = cellCenters(i,:);
cellCenter_x= cellCenTemp(1,2); %% col
cellCenter_y= - cellCenTemp(1,1); %% row
for x =cellCenter_x-CapR : cellCenter_x+CapR
    y1= cellCenter_y - sqrt(CapR^2- (x-cellCenter_x)^2);
    y2= cellCenter_y + sqrt((CapR)^2- (x-cellCenter_x)^2);
    for y = y1:y2
        row =round(-y);
        col = round(x);
        rno=rand(1);
        if rno< Den_c                % Density of outer Actin Nodes in
cap
            npfChart(row,col)= Vnpf;    % Initializing Nucleation
points
        end
    end
end
end

% Count and initialize Nucleation Points
```

---

```

% %
disp('Making NFPIDs')
NPFCCount=1;

for colNo=1:bound
    for rowNo=1:bound
        if npfChart(rowNo,colNo)==Vnpf
            NPF(NPFCCount,1)=rowNo;%NPF stores nucleation points
            location data
            NPF(NPFCCount,2)=colNo;
            NPFCCount=NPFCCount+1;
        end
    end
end
NPFCCount=NPFCCount-1;

initializing Npfs
Making NFPIDs

imagesc(npfChart)
pause(1)

%%---Following lines of code will initialize actin nodes using the
%%nucleation points

Ac_NodeCount=1;
for i=1:NPFCCount
    row= NPF(i,1);
    col= NPF(i,2);
    dir=randi(8);
    theta = directions(dir,3);
    dir_c= cos(deg2rad(theta));
    dir_r= -sin(deg2rad(theta));

    len=randi(8);
    Fnpf_r= Knpf*dir_r*len;%polymerization force
    Fnpf_c= Knpf*dir_c*len;

    rowNo=row+Fnpf_r; % actin position
    colNo=col+Fnpf_c; % actin position

    Ac_Node(Ac_NodeCount,ROW)=rowNo; %Update Actin array with rowNo
    Ac_Node(Ac_NodeCount,COL)=colNo;
    Ac_Node(Ac_NodeCount,BRANCHORNOT)= 0; % A zero at this position
    represents unbranched
    Ac_Node(Ac_NodeCount,THETA)=theta %direction of actin filamnet
    Ac_Node(Ac_NodeCount,LEN)= sqrt((rowNo-row)^2+(colNo-col)^2); %
    will store length of filament
    Ac_Node(Ac_NodeCount,ASSCNPF)= i; % associated NPF
    Ac_Node(Ac_NodeCount,MCSATBIRTH)= 0; % Simulation step of
    creation like a date of birth
    Ac_Node(Ac_NodeCount,AGE)= len; % age of actin filament is made
    different initially for variability

```

---

---

```
    Ac_NodeNo(round(rowNo),round(colNo))= Ac_NodeCount; % this stores
Actin node ID in an array
    Combo(round(rowNo),round(colNo))= Ac; % Update Combo(visualization
lattice) with Actin

    Ac_NodeCount=Ac_NodeCount+1;
end
Ac_NodeCount=Ac_NodeCount-1;
```

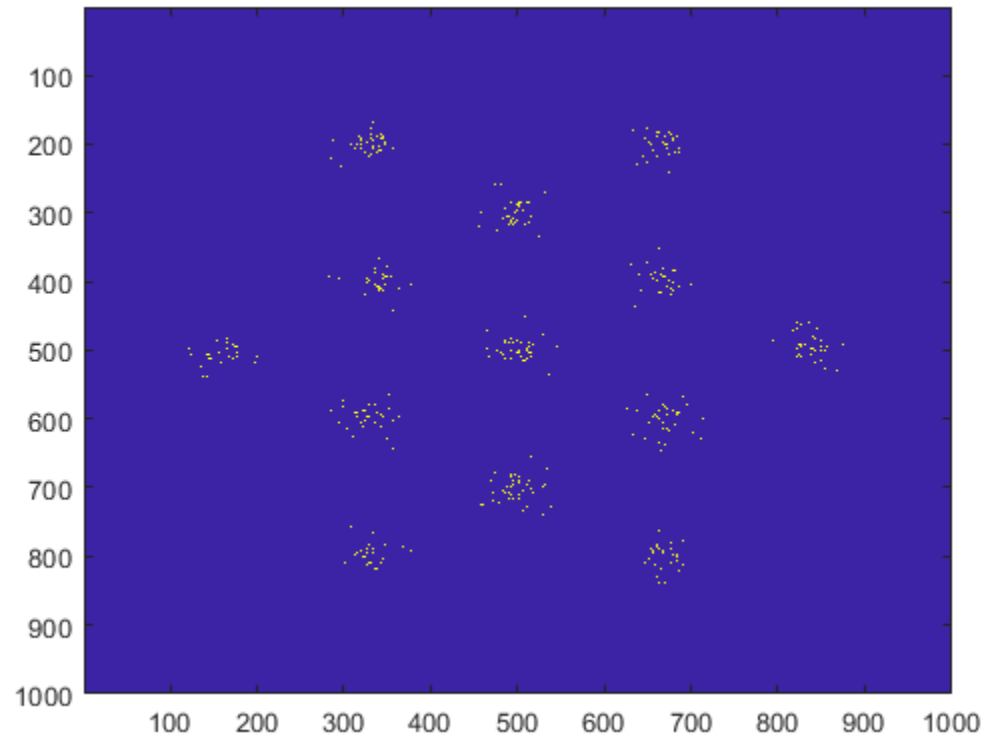

*Published with MATLAB® R2020b*

---

## Table of Contents

|                                                           |   |
|-----------------------------------------------------------|---|
| SIMULATION STARTS HERE .....                              | 1 |
| initializing the arrays that are used in simulation ..... | 1 |
| % Forces calculation --- call associated module .....     | 1 |
| VISUALIZATION and GENERATING IMAGES% % % % .....          | 3 |
| visualization of myosin concentration .....               | 3 |

## SIMULATION STARTS HERE

This file is used to run the simulation after the initialization is completed. It calls module 'Force\_Calculation' to first calculate forces on individual nodes of both material and then moves actin nodes by calling module 'MoveActin' and myosin nodes by calling module "MoveMyosin". These modules are called randomly, so that both the materials have a random chance to get the first move. Thereafter, the code deletes filaments that have aged. It also removes wall to test affect of wall removal. Finally it generates output in form of images to visualize and study material behavior in the given setup.

```
NodeDensity = zeros(4000,2);  
for mcs=1:2500
```

```
    mcs
```

## initializing the arrays that are used in simulation

```
    NewActin=0;
```

```
    F_AcNet=zeros(Ac_NodeCount,2);
```

```
    Rho_my=zeros(Ac_NodeCount,2);
```

```
    F_MyoNet=zeros(Mc_NodeCount,2); % total(spring + myosin) force on  
    each node
```

```
    F_am=zeros(Mc_NodeCount,2); % net Actomyosin force
```

```
    F_r_Nb= zeros(Mc_NodeCount,MaxNeighAllowed); % Actomyosin force  
    in x direction by ith neighbor
```

```
    F_c_Nb= zeros(Mc_NodeCount,MaxNeighAllowed); % actomyosin force  
    in y direction by ith neighbor
```

```
    F_r_NbSp= zeros(Mc_NodeCount,MaxNeighAllowed); % Spring force in x  
    direction by ith neighbor
```

```
    F_c_NbSp= zeros(Mc_NodeCount,MaxNeighAllowed); % Spring force in  
    y direction by ith neighbor
```

```
    F_Spring=zeros(Mc_NodeCount,2); % Net PRing force by all  
    nneighbors
```

```
    F_myoT=zeros(Mc_NodeCount,2);
```

## % Forces calculation --- call associated module

```
    Force_MyosinThenActinNEW;
```

---

```

Combo = zeros(bound, bound);
R=rand(1);

%% %Randomly chose actin or myosin material for moving nodes

if R>0.5
    MoveMyosin;
    MoveActin;
else
    MoveActin;
    MoveMyosin;
end

%%%%%%%%%%%%%%%%%%%%%%%%%%%%%%%%%%%%%%%%%%%%%%%%%%%%%%%%%%%%%%%%%%%%%%%%%%%%%%
%%
kount=0;
for NodeID= 1:Ac_NodeCount
    if NodeID>Ac_NodeCount
        break
    end
    if Ac_Node(NodeID, AGE) > (AgeTh) %% instead of length compare
age of actin
        Rno= rand(1);
        if Rno< P_del
            %                disp('count deleting nodes')
            kount= kount+1;
            NodeToDel(kount)= NodeID;
        end
    end
end

for del = kount:-1:1 %% deleting in reverse order to avoid shifting
overhead of nodeID
    NodeID= NodeToDel(del);
    Combo(round(Ac_Node(NodeID, ROW)), round(Ac_Node(NodeID, COL)))=0;
    %    disp('Deleteing Now')
    Ac_Node(NodeID, :)=[];
    Ac_NodeCount=Ac_NodeCount-1;

end
% % Reassigning Ac_NodeNo
Ac_NodeNo=ones(rows, cols).*-1;
for NodeID= 1:Ac_NodeCount

    Ac_NodeNo(round(Ac_Node(NodeID, ROW)), round(Ac_Node(NodeID, COL)))=NodeID;
end

%%%%%%%%%%%%%%%%%%%%%%%%%%%%%%%%%%%%%%%%%%%%%%%%%%%%%%%%%%%%%%%%%%%%%%%%%%%%%%
%%%%%%%%%%%%%%%%%%%%%%%%%%%%%%%%%%%%%%%%%%%%%%%%%%%%%%%%%%%%%%%%%%%%%%%%-----THE END-----%%%%%%%%%%%%%%%%%%%%%%%%%%%%%%%%%%%%%%%%%%%%%%%%%%%%%%%%%%%%%%%%%%%%%%%%

```

---

---

# VISUALIZATION and GENERATING IMAGES%

## %%%%%%%%

```
if mcs==2

    close all
    cd (absoluteFolderPath)
    Actinfoldername=strcat('Combo');
    mkdir(Actinfoldername);
    cd (Actinfoldername)
    filename=strcat('Actin_',num2str(mcs));
    fig = figure;
    imagesc(Combo)
    axis square
    colormap('hot')

% % %                imshow(C, 'Colormap', jet(255))
print(fig,filename,'-dpng');

cd ..
```

## visualization of myosin concentration

```
MyoCON=zeros(bound,bound);
for i = 1:Mc_NodeCount
    roNo= round(Mc_Node(i ,ROW));
    coNo= round(Mc_Node(i ,COL));
    valu= Mc_Node(i ,MYO_CONC);
    MyoCON(roNo,coNo)=valu;
end
Myofoldername=strcat('MyoCon');
mkdir(Myofoldername);
cd (Myofoldername)

filename=strcat('MyoCON',num2str(mcs));
fig = figure;
imagesc(MyoCON)
colormap('gray')
print(fig,filename,'-dpng');

cd ..
cd ..

end

% if mod(mcs,100)==0
%
%     tbl=tabulate( Mc_Node(:,NO_OF_NEIGHBOR));
%     cd (absoluteFolderPath)
%     filename=strcat('FreqN_',num2str(mcs));
```



---

```

%         fig = figure;
%         bar(tbl(:,1),tbl(:,2))
%         print(fig,filename,'-dpng');
%         cd ..
%     end

if mod(mcs,50)==0
    close all
    cd (absoluteFolderPath)
    Actinfoldername=strcat('Combo');
    mkdir(Actinfoldername);
    cd (Actinfoldername)
    filename=strcat('Actin_',num2str(mcs));
    fig = figure;
    imagesc(Combo)
    axis square
    colormap('hot')

    %         imshow(C, 'Colormap', jet(255))
    print(fig,filename,'-dpng');

    cd ..

    MyoCON=zeros(bound,bound);
    for i = 1:Mc_NodeCount
        roNo= round(Mc_Node(i ,ROW));
        coNo= round(Mc_Node(i ,COL));
        valu= Mc_Node(i ,MYO_CONC);
        MyoCON(roNo,coNo)=valu;
    end
    cd (Myofoldername)
    filename=strcat('MyoCON',num2str(mcs));
    fig = figure;
    imagesc(MyoCON)
    colormap('gray')
    print(fig,filename,'-dpng');

    cd ..
    cd ..

%
end
%
M=Ac_NodeNo>0;
nnz(M);
ActinLenCounter(mcs)=length(find(Ac_Node(:,6)<=AgeBr));
ActinCounter(mcs)=Ac_NodeCount;
NewBranches(mcs)=NewActin;
DelActin(mcs)=kount;

end
cd (absoluteFolderPath)

```

---

---

```
filename=strcat('ActtotalPlot_',num2str(mcs));
fig = figure;
plot(ActinCounter)
print(fig,filename,'-dpng');

filename=strcat('LenPlot_',num2str(mcs));
fig = figure;
plot(ActinLenCounter)
print(fig,filename,'-dpng');

    filename=strcat('NewActinPlot_',num2str(mcs));
fig = figure;
plot(NewBranches)
print(fig,filename,'-dpng');

    filename=strcat('DelActinPlot_',num2str(mcs));
fig = figure;
plot(DelActin)
print(fig,filename,'-dpng');
cd ..
```

*Published with MATLAB® R2020b*

---

# This file calculates forces first on myosin nodes and then on actin nodes.

## Table of Contents

|                                                                                                                                                     |   |
|-----------------------------------------------------------------------------------------------------------------------------------------------------|---|
| Myosin node experience forces from neighboring nodes and due to actin pushing. ....                                                                 | 1 |
| Actin node experiences forces from actin polymerization directed outward from nucleation point to enable actin growth and from myosin pushing. .... | 1 |
| ---- This section calculates myosin forces ---- .....                                                                                               | 1 |
| If there is tension in the spring .....                                                                                                             | 2 |
| --- This section calculates actin forces ---- .....                                                                                                 | 5 |

**Myosin node experience forces from neighboring nodes and due to actin pushing.**

**Actin node experiences forces from actin polymerization directed outward from nucleation point to enable actin growth and from myosin pushing.**

**---- This section calculates myosin forces ----**

```
count = 0
csvdata=zeros(Mc_NodeCount*6,7);

RandNodes=randperm(Mc_NodeCount);
for i = 1: Mc_NodeCount
    NodeID= RandNodes(i); %randomly pick up one myosin node
    % % Calculating forces
    if Mc_Node(NodeID,MOVEORNOT)==1 % check if it is a unmovable node
        % disp('found a fixed node, so net force is zero')
        F_MyoNet(NodeID,ROW)= 0; % set all forces on this node to be
zero
        F_MyoNet(NodeID,COL)= 0;
        % disp('NodeID=')NodeID ;
    else
        % Force calculation of myosin starts here sicne these are
movable nodes

        for i = 1: Mc_Node(NodeID,NO_OF_NEIGHBOR) % for all neighbors
```

```
NbID = neighborhood(NodeID,i); % pick one neighbor and
get Neighbor iD
if NbID ~=0 %Neighbor ID can not be zero,

    tn_c_Nb= Mc_Node(NbID,COL)- Mc_Node(NodeID,COL); %
OUTWARD VECTOR since pulling from neighbor will be directed out

    tn_r_Nb= Mc_Node(NbID,ROW)- Mc_Node(NodeID,ROW);

    tn_Nb = 0.001+sqrt((tn_r_Nb)^2 + (tn_c_Nb)^2); %
distance between node and neighbor (adding .001 to avoid numerical
instability)

    if mod(mcs,500)==0
        count = count +1

    csvdata(count,:)=[NodeID,NbID,Mc_Node(NodeID,ROW),Mc_Node(NodeID,COL),Mc_Node(NbID,
(tn_Nb-3.5)];

end
```

## If there is tension in the spring

----Implementing Equation-2 -----

```
F_NbSp=0;
if tn_Nb>tn_rest

    % % Spring force calculation

    F_NbSp = KSp*(tn_Nb- tn_rest); % force generated
due to spring = constant times stretch

    F_r_NbSp(NodeID,i)= F_NbSp*(tn_r_Nb/tn_Nb); %
outward force felt by the node due to tension
    F_c_NbSp(NodeID,i)= F_NbSp*(tn_c_Nb/tn_Nb); % This
is equal to magnitude*unit vector

end

F_Spring(NodeID,ROW)= F_Spring(NodeID,ROW) +
F_r_NbSp(NodeID,i); %adding forces by all the neighbors
F_Spring(NodeID,COL)= F_Spring(NodeID,COL)+
F_c_NbSp(NodeID,i); % Net Spring force

% % Inter-myosin force calculation
% ----Implementing Equation-1 -----
% % calculate pulling forces from myosin neighbors
F_Nb=0;
AM_Neighbor= Mc_Node(NbID,MYO_CONC);% %fetch the
myosin activity on node and neighbor
AM_BaseNode= Mc_Node(NodeID,MYO_CONC);%
```

```

F_Nb =(K*AM_Neighbor*AM_BaseNode); ; % force magnitude

F_r_Nb(NodeID,i)=F_Nb*(tn_r_Nb/tn_Nb); % Actomyosin
force on the node due to ith neighbor
F_c_Nb(NodeID,i)=F_Nb*(tn_c_Nb/tn_Nb); % magnitude *
unit vector

F_am(NodeID,ROW)= F_am(NodeID,ROW)+
F_r_Nb(NodeID,i); % %adding forces by all the neighbors
F_am(NodeID,COL)= F_am(NodeID,COL)+
F_c_Nb(NodeID,i); % Net inter-myosin pulling force

end

end

%%-----Following lines of code will calculate actin pushing
forces on myosin due to the actin polymerization----%
% ----Implementing Equation-7 -----
totalPoints=0;
points=0;

colNo= Mc_Node(NodeID,COL); % the position of current node
rowNo= Mc_Node(NodeID,ROW);
for R= rowNo-SR : rowNo+SR %% searching around the Myosin
node in search radius
    for C= colNo-SR:colNo+SR
        if Ac_NodeNo(round(R),round(C))> 0 % if there is an
actin node in vicinity (search radius)
            totalPoints= totalPoints+1;
            points(totalPoints,1) = R; %% Save the position
where actin node is present
            points(totalPoints,2) = C;
        end
    end
end

%---Following lines will calculate forces from actin nodes
found in the
%---above determined positions

Fcap_R=0;
Fcap_C=0;

for i= 1: totalPoints
    R= points(i,1) ;
    C= points(i,2);

    Act2Myo_r= rowNo - R;
    Act2Myo_c= colNo - C; % vector directed towards the
myosin node

```

```
tn_Act2Myo= sqrt((Act2Myo_r)^2+(Act2Myo_c)^2);

% accessing the features of actin - its ID, nucleation
point and
% direction
ActID= Ac_NodeNo(round(R),round(C));
npfID= Ac_Node(ActID,ASSCNPF);
theta = Ac_Node(ActID,THETA);

dir_C= cos(deg2rad(theta)); %% x is the col
dir_R= -sin(deg2rad(theta));

Fpush_R=Knpf*dir_R;
Fpush_C=Knpf*dir_C ; %% forces in x direction
Fpush = sqrt((Fpush_R)^2+(Fpush_C)^2); % magnitude of
actin pushing force

cosPhi= (Act2Myo_r*Fpush_R+Act2Myo_c*Fpush_C)/
(tn_Act2Myo*Fpush); % calculate cosPhi

if cosPhi>=0 % if cosPhi>0 --> apply forces else dont
apply

    Fcap_R(i)= Fpush_R*cosPhi;
    Fcap_C(i)= Fpush_C*cosPhi;
else

    Fcap_R(i)= 0;
    Fcap_C(i)= 0;

end

end

Fcappush(NodeID,ROW)=sum(Fcap_R); % sum up the different actin
node forces
Fcappush(NodeID,COL)=sum(Fcap_C);

%%%%%%%%----- Net FORCES APPLIED TO MYOSIN NODE -----%%%%%%%%
F_myot(NodeID,ROW)= F_am(NodeID,ROW)+F_Spring(NodeID,ROW); %
these are only through myosin material
F_myot(NodeID,COL)= F_am(NodeID,COL)+F_Spring(NodeID,COL);

F_MyoNet(NodeID,ROW)= F_am(NodeID,ROW)+F_Spring(NodeID,ROW)+
Fcappush(NodeID,ROW); % These are total forces from both materials
F_MyoNet(NodeID,COL)= F_am(NodeID,COL)+F_Spring(NodeID,COL)+
Fcappush(NodeID,COL);

end

end
if mod(mcs,500)==0
```

```
cd (absoluteFolderPath)
filename=strcat('csvdata_',num2str(mcs),'.csv');

csvwrite(filename,csvdata(1:count,:));
cd ..
end
```

## --- This section calculates actin forces -----

```
%----Implementing Equation-5-----
%%---Following lines calculate actin polymerization force directed
outward
%%---from nucelation points.

RandNodes=randperm(Ac_NodeCount);
for i= 1:Ac_NodeCount
    NodeID= RandNodes(i); % randomly pick up an actin node

    npfID= Ac_Node(NodeID,ASSCNPF); % corresponding nucleation
point

    theta = Ac_Node(NodeID,THETA); % angle of the filament used to get
its direction

    dir_C= cos(deg2rad(theta)); %% x is the col
    dir_R= -sin(deg2rad(theta)); %% taking -ve sign because the y axis
of the image is pointed downwards

    if Ac_Node(NodeID,LEN) > Lth % cap the actin filament after a
length threshold
        Fpoly(NodeID,ROW) =0 ; % If reached certain length growth
stops.
        Fpoly(NodeID,COL) =0 ;
    else

        Fpoly(NodeID,ROW)= Knpf*dir_R; % polymerization force
        Fpoly(NodeID,COL)= Knpf*dir_C;
    end

    %%----Following lines calculate forces from the myosin node
directed towards actin node----%%%%%%%%
    % ----Implementing Supplementary Equation-1 -----
    totalPoints=0;
    points=0;
    noOfNodesPosition=0;

    colNo= Ac_Node(NodeID,COL); %get the position of actin node
    rowNo= Ac_Node(NodeID,ROW);
    for R= rowNo-SR : rowNo+SR %% searching around the actin node
in search radius
        for C= colNo-SR:colNo+SR
            if Mc_NodeNo(round(R),round(C))> 0 % if myosin node is
found in vicinity
```

```
totalPoints= totalPoints+1;
points(totalPoints,1) = R; %% Save the position of
myosin
    points(totalPoints,2) = C;
    noOfNodesPosition(totalPoints) =
NodeCountPerPixel((round(R)),(round(C))); % check how many nodes are
actually present at this location
end
end
end

%---Following lines will calculate forces from myosin nodes found
in the
%---above determined positions

RhoMyo_R=0;
RhoMyo_C=0;
noOfNodesPosition;
for i= 1: totalPoints
    R= points(i,1) ;
    C=points(i,2);

    Myo2Act_r= rowNo - R;
    Myo2Act_c= colNo - C; % vector directed towards the actin
from myo
    tn_Myo2Act= sqrt((Myo2Act_c)^2+(Myo2Act_r)^2);

    MyoID= Mc_NodeNo(round(R),round(C));

    F_myor=F_myot(MyoID,ROW); % % forces in -y direction
    F_myoc=F_myot(MyoID,COL); %% forces in x direction
    F_myoc= sqrt((F_myor)^2+(F_myoc)^2); %% net magnitude of force
from myosin based on actomyosin material forces

    cosPhi= (Myo2Act_r*F_myor+Myo2Act_c*F_myoc)/
(tn_Myo2Act*F_myoc);

    if cosPhi>=0 % force will be applied only if cosPhi>0

        RhoMyo_R(i)= noOfNodesPosition(totalPoints)*
F_myor*cosPhi; %force magnitude times the # of nodes at the position
        RhoMyo_C(i)= noOfNodesPosition(totalPoints)*
F_myoc*cosPhi; % gives an assesment of cumulative effect of all nodes
in that position
    else
        RhoMyo_R(i)= 0;
        RhoMyo_C(i)= 0;

    end

end

Rho_dynR(NodeID,1)=sum(RhoMyo_R); % summing up all myo node
forces
```



```
Rho_dynC(NodeID,1)=sum(RhoMyo_C);

Rho_myo(NodeID,ROW)= Rho_dynR(NodeID,1);%
Rho_myo(NodeID,COL)= Rho_dynC(NodeID,1);%

%%%%%%%%----- Net FORCES APPLIED TO ACTIN NODE -----%%%%%%%%
F_AcNet(NodeID,ROW)= Fpoly(NodeID,ROW)+Rho_myo(NodeID,ROW);
F_AcNet(NodeID,COL)= Fpoly(NodeID,COL)+Rho_myo(NodeID,COL);

end
```

*Published with MATLAB® R2020b*

---

# This file moves actin node to a new position depending of the force applied on the node.

## Table of Contents

|                                                      |   |
|------------------------------------------------------|---|
| -----Implementing equation-6 ----- .....             | 1 |
| %%%%%%%%%% Creating Actin Branches %%%%%%%%%%% ..... | 2 |

--When actin filament length reaches a threshold, it stopes further growth of the respective actin node. When actin filament reaches a predefined length, it enables branching of that filament, by creating new actin nodes and nucleation points.

## -----Implementing equation-6 -----

```
RandNodes=randperm(Ac_NodeCount);
for i = 1: Ac_NodeCount

    NodeID= RandNodes(i);

    npfID= Ac_Node(NodeID,ASSCNPF);

    %% rounding to 2 digit to control spatial resolution

    NewrowNo= round(Ac_Node(NodeID,ROW)+ F_AcNet(NodeID,ROW),2); %%
    New actin barbed end position
    NewcolNo= round(Ac_Node(NodeID,COL)+ F_AcNet(NodeID,COL),2); %%
    New actin barbed end position

    for R= NewrowNo-Aura : NewrowNo+Aura    %% search all around the
    node for myosin
        for C= NewcolNo-Aura:NewcolNo+Aura

            %% % if there is a myosin node in the vicinity of the new
            %% position, actin node is kept in the old position
            if Mc_NodeNo(round(R),round(C))>-1    %% check if node is a
myosin node
                NewrowNo=Ac_Node(NodeID,ROW);
                NewcolNo=Ac_Node(NodeID,COL);
            end
        end
    end

    %%---Updating actin node features---
    Ac_NodeNo(round(Ac_Node(NodeID,ROW)),round(Ac_Node(NodeID,COL))) =
-1;
```

This file moves actin node to  
a new position depending of  
the force applied on the node.

---

```
Ac_Node(NodeID,ROW)=NewrowNo;  
Ac_Node(NodeID,COL)=NewcolNo;  
Ac_Node(NodeID,LEN)= sqrt((NewrowNo- NPF(npfID,1))^2+(NewcolNo-  
NPF(npfID,2))^2); %length of filament  
Ac_Node(NodeID,AGE)= mcs- Ac_Node(NodeID,MCSATBIRTH); %% age of  
actin updated  
  
Ac_NodeNo(round(Ac_Node(NodeID,ROW)),round(Ac_Node(NodeID,COL)))=NodeID;  
  
Combo(round(NewrowNo),round(NewcolNo))= Ac; % Add the barbed end  
to the combo lattice
```

## %%%%%%%%%% Creating Actin Branches %%%% %%%%%%%%%%

```
if Ac_Node(NodeID,AGE)> AgeBr  
  
    if Ac_Node(NodeID,BRANCHORNOT) ==0 %check if no branch has  
    been generated out of this branch till now  
  
        theta_Node= Ac_Node(NodeID,THETA); % fetching angle of the  
current node  
        Rflip= rand(1);  
        if Rflip>0.5  
            flip = 1;  
        else  
            flip = -1;  
        end  
  
        theta_NPF= theta_Node+ flip* 70 ;% degree allignment of  
the new branch FIXED 70  
  
        BrPoint_row = (NPF(npfID,ROW)+Ac_Node(NodeID,ROW))/2;  
        BrPoint_col = (NPF(npfID,COL)+Ac_Node(NodeID,COL))/2;  
        %  
        dir_C= cos(deg2rad(theta_NPF)); % x is col  
        dir_R= -sin(deg2rad(theta_NPF)); % y is negative for  
image  
  
        Fnpf_c= Knpf*dir_C;  
        Fnpf_r= Knpf*dir_R;  
  
        %% rounding to 2 didgit to control spatial resolution:  
  
        BRrowNo=round((BrPoint_row+Fnpf_r),2); % branched actin  
position  
        BRcolNo=round((BrPoint_col+Fnpf_c),2); % branched actin  
position
```

This file moves actin node to  
a new position depending of  
the force applied on the node.

---

```
if Mc_NodeNo(round(BRrowNo),round(BRcolNo))> -1 %% just
check for presence of mysoin on that point
    disp('cant branch');
else

    Ac_Node(NodeID,BRANCHORNOT) = 1;    %%%now branched
    %----creating new nucleation point for the branch----
    NPFCount=NPFCount+1;    %% new npf

    NPF(NPFCount,ROW)= BrPoint_row;
    NPF(NPFCount,COL)= BrPoint_col;

    Ac_NodeCount=Ac_NodeCount+1;

    % Updating Node array for the newborn actin which just
    % branched
    Ac_Node(Ac_NodeCount,ROW)=BRrowNo;
    Ac_Node(Ac_NodeCount,COL)=BRcolNo;
    Ac_Node(Ac_NodeCount,BRANCHORNOT)=0; %unbranched
    Ac_Node(Ac_NodeCount,THETA)=theta_NPF %direction of
new actin filamnet
    Ac_Node(Ac_NodeCount,LEN)= sqrt((BRrowNo-
NPF(NPFCount,1))^2+(BRcolNo-NPF(NPFCount,2))^2);
    Ac_Node(Ac_NodeCount,ASSCNPF)= NPFCount;    % associated
NPF
    Ac_Node(Ac_NodeCount,MCSATBIRTH)= mcs;    % time of
creation
    Ac_Node(Ac_NodeCount,AGE)= mcs-
Ac_Node(Ac_NodeCount,MCSATBIRTH);    % age of actin

    Combo(round(Ac_Node(Ac_NodeCount,ROW)),round(Ac_Node(Ac_NodeCount,COL)))=
Ac;

    Ac_NodeNo(round(Ac_Node(Ac_NodeCount,ROW)),round(Ac_Node(Ac_NodeCount,COL)))=
Ac_NodeCount;

    NewActin=NewActin+1;

end
end
end
end
```

*Published with MATLAB® R2020b*

---

## Table of Contents

|                                                                                                  |   |
|--------------------------------------------------------------------------------------------------|---|
| This file moves actin node to a new position depending of the force applied on the node. ....    | 1 |
| Lastly, this file applies the elevated myosin upon saturation. Thus testing the hypothesis. .... | 1 |
| -----Implementing Equation-4----- .....                                                          | 1 |
| if trying to reach a staured point then Increase myosin .....                                    | 2 |

**This file moves actin node to a new position depending of the force applied on the node.**

```
%----When moving a mysoin node, it checks for availability of
the
%----new position in two checks. 1. Node/pixel saturation 2.
actin node
%----occupancy.
```

**Lastly, this file applies the elevated myosin upon saturation. Thus testing the hypothesis.**

**-----Implementing Equation-4-----**

```
RandNodes=randperm(Mc_NodeCount);
for i = 1: Mc_NodeCount

    NodeID= RandNodes(i);

    colNo= Mc_Node(NodeID,COL);
    rowNo= Mc_Node(NodeID,ROW);

    % % rounding to 2 didgit to control spatial resolution
    NewcolNo = round(colNo+ F_MyoNet(NodeID,COL),2);
    NewrowNo = round(rowNo+ F_MyoNet(NodeID,ROW),2);

    %%---check-1: Node/pixel saturation

    noOfNodesAtNewPosition = NodeCountPerPixel((round(NewrowNo)),
(round(NewcolNo)));

    if noOfNodesAtNewPosition == Max_myosin_nodes_per_pixels
        NewcolNo= colNo;
        NewrowNo= rowNo;
    end
    %%--- Check-2: Actin node occupancy: checking if there is
actin in the way

    for R= NewrowNo-Aura:NewrowNo+Aura
        for C= NewcolNo-Aura:NewcolNo+Aura
```

---

```

        if Ac_NodeNo ( round(R),round(C))> -1
            NewcolNo= colNo;
            NewrowNo= rowNo;
        end
    end
end

%%---Updating myosin node features---

Mc_NodeNo(round(Mc_Node(NodeID,ROW)),round(Mc_Node(NodeID,COL)))= -1;
%% reset the NodeNo in order to create it again afresh

Mc_Node(NodeID,ROW)= NewrowNo;
Mc_Node(NodeID,COL)= NewcolNo;

Mc_NodeNo(round(NewrowNo),round(NewcolNo))=NodeID; % new
place has you

Combo(round(NewrowNo),round(NewcolNo))=Mc; % refresh combo

NodeCountPerPixel((round(NewrowNo)),(round(NewcolNo))) =
NodeCountPerPixel((round(NewrowNo)),(round(NewcolNo))) + 1;
NodeCountPerPixel((round(rowNo)), (round(colNo))) =
NodeCountPerPixel((round(rowNo)),(round(colNo))) - 1 ;

```

## if trying to reach a staured point then In-crease myosin

```

        if noOfNodesAtNewPosition>5 %%increasing myosin when density
per pixel increases 5

            Mc_Node(NodeID,MYO_CONC)=0.6;

        end
    end
end

```

*Published with MATLAB® R2020b*
